# Supplementary material
Source: PubMed Central journal article supplement (PMC2794514)
Supplement: neo1112_1329SD1.pdf [file neo1112_1329SD1.pdf]

**Table W1.** List of the 181 Reactivated Genes after 5Aza-dC Treatment Identified by RaSH cDNA Library.

| Sequence     | Official Symbol | CpG Island | Spotted in Array |
|--------------|-----------------|------------|------------------|
| CV341138     | —               | Yes        | Yes              |
| NM_000700    | <i>ANXA1</i>    | No         | Yes              |
| NM_001008897 | <i>TCP1</i>     | Yes        | Yes              |
| NM_002462    | <i>MX1</i>      | Yes        | Yes              |
| NM_005562    | <i>LAMC2</i>    | No         | Yes              |
| NM_005347    | <i>HSPA5</i>    | Yes        | Yes              |
| NM_004509    | <i>SPL10</i>    | Yes        | No               |
| NM_005610    | <i>RBBP4</i>    | Yes        | Yes              |
| NM_001001977 | <i>ATP5E</i>    | Yes        | Yes              |
| NM_022073    | <i>EGLN3</i>    | Yes        | Yes              |
| NM_006476    | <i>ATP5L</i>    | Yes        | Yes              |
| NM_002893    | <i>RBBP7</i>    | Yes        | No               |
| NM_001799    | <i>CDK7</i>     | Yes        | Yes              |
| NM_016237    | <i>ANAPC5</i>   | Yes        | Yes              |
| NM_002463    | <i>MX2</i>      | Yes        | Yes              |
| NM_001852    | <i>COL9A2</i>   | Yes        | No               |
| NM_022121    | <i>PERP</i>     | Yes        | Yes              |
| NM_001012456 | <i>SEC61G</i>   | Yes        | Yes              |
| NM_002535    | <i>OAS2</i>     | Yes        | No               |
| NM_015013    | <i>AOF2</i>     | Yes        | Yes              |
| NM_006135    | <i>CAPZA1</i>   | Yes        | Yes              |
| NM_018835    | <i>RC3H2</i>    | Yes        | No               |
| NM_144596    | <i>TTC8</i>     | Yes        | No               |
| NM_002227    | <i>JAK1</i>     | No         | Yes              |
| NM_014352    | <i>POU2F3</i>   | Yes        | Yes              |
| NM_004923    | <i>MTL5</i>     | Yes        | Yes              |
| NM_003406    | <i>YWHAZ</i>    | Yes        | Yes              |
| NM_001007074 | <i>RPL32</i>    | Yes        | Yes              |
| NM_033407    | <i>DOCK7</i>    | Yes        | No               |
| NM_001686    | <i>ATP5B</i>    | Yes        | Yes              |
| NM_017688    | <i>BSPRY</i>    | Yes        | Yes              |
| NM_000979    | <i>RPL18</i>    | Yes        | No               |
| NM_005056    | <i>JARID1A</i>  | No         | Yes              |
| NM_020675    | <i>SPC25</i>    | Yes        | Yes              |
| NM_004371    | <i>COPA</i>     | Yes        | No               |
| NM_012420    | <i>IFIT5</i>    | Yes        | Yes              |
| NM_019606    | <i>MEPCE</i>    | Yes        | Yes              |
| NM_015091    | <i>FAM179B</i>  | Yes        | Yes              |
| NM_014612    | <i>FAM120A</i>  | Yes        | No               |
| NM_139266    | <i>STAT1</i>    | Yes        | Yes              |
| NM_014969    | <i>WDR47</i>    | Yes        | Yes              |
| NM_006004    | <i>UQCRH</i>    | Yes        | Yes              |
| NM_006819    | <i>STIP1</i>    | Yes        | Yes              |
| NM_004487    | <i>GOLGB1</i>   | Yes        | Yes              |
| NM_002421    | <i>MMP1</i>     | No         | No               |
| NM_006603    | <i>STAG2</i>    | Yes        | Yes              |
| NM_015340    | <i>LARS2</i>    | Yes        | Yes              |
| NM_000602    | <i>SERPINE1</i> | No         | Yes              |
| NM_198076    | <i>FAM36A</i>   | Yes        | Yes              |
| NM_003746    | <i>DYNLL1</i>   | Yes        | Yes              |
| NM_005782    | <i>THOC4</i>    | Yes        | Yes              |
| NM_018660    | <i>ZNF395</i>   | Yes        | Yes              |
| NM_003792    | <i>EDF1</i>     | Yes        | Yes              |
| NM_005381    | <i>NCL</i>      | Yes        | Yes              |
| NM_005762    | <i>TRIM28</i>   | Yes        | Yes              |
| NM_002231    | <i>CD82</i>     | Yes        | Yes              |
| NM_002797    | <i>PSMB5</i>    | No         | Yes              |
| NM_001748    | <i>CAPN2</i>    | Yes        | No               |
| NM_001009925 | <i>C20orf30</i> | Yes        | Yes              |
| NM_000646    | <i>AGL</i>      | Yes        | Yes              |
| NM_183356    | <i>ASNS</i>     | Yes        | Yes              |
| NM_005100    | <i>AKAP12</i>   | Yes        | Yes              |
| NM_006421    | <i>ARFGEF1</i>  | Yes        | No               |
| NM_198829    | <i>RAC1</i>     | Yes        | Yes              |
| NM_006931    | <i>SLC2A3</i>   | No         | Yes              |
| NM_000366    | <i>TPM1</i>     | Yes        | Yes              |
| NM_005365    | <i>MAGEA9</i>   | No         | Yes              |
| NM_006815    | <i>TMED2</i>    | Yes        | Yes              |
| NM_022754    | <i>SFXN1</i>    | Yes        | Yes              |
| NM_004755    | <i>RPS6KA5</i>  | Yes        | Yes              |
| NM_015382    | <i>HECTD1</i>   | Yes        | No               |
| NM_005243    | <i>EWSR1</i>    | Yes        | Yes              |

**Table W1.** (continued)

| Sequence     | Official Symbol  | CpG Island | Spotted in Array |
|--------------|------------------|------------|------------------|
| NM_004130    | <i>GYG1</i>      | Yes        | Yes              |
| NM_153649    | <i>TPM3</i>      | Yes        | Yes              |
| NM_021101    | <i>CLDN</i>      | Yes        | Yes              |
| NM_006549    | <i>CAMKK2</i>    | Yes        | Yes              |
| NM_001175    | <i>ARHGDI1B</i>  | No         | Yes              |
| NM_002673    | <i>PLXNB1</i>    | Yes        | Yes              |
| NM_198147    | <i>LOC116236</i> | Yes        | Yes              |
| NM_014758    | <i>SNX19</i>     | Yes        | Yes              |
| NM_016565    | <i>CHCHD8</i>    | Yes        | Yes              |
| NM_020914    | <i>RNF213</i>    | Yes        | No               |
| NM_000576    | <i>IL1B</i>      | No         | Yes              |
| NM_005388    | <i>PDCL</i>      | Yes        | No               |
| NM_001080    | <i>ALDH5A1</i>   | Yes        | Yes              |
| NM_014611    | <i>MDN1</i>      | Yes        | No               |
| NM_015509    | <i>NECAP1</i>    | Yes        | Yes              |
| NM_003932    | <i>ST13</i>      | Yes        | Yes              |
| NM_002274    | <i>KRT13</i>     | No         | Yes              |
| NM_005789    | <i>PSME3</i>     | Yes        | Yes              |
| NM_182972    | <i>IRF2BP2</i>   | Yes        | No               |
| NM_004859    | <i>CLTC</i>      | Yes        | Yes              |
| NM_133337    | <i>FER1L3</i>    | Yes        | Yes              |
| NM_178868    | <i>CMTM8</i>     | Yes        | Yes              |
| NM_018043    | <i>ANO1</i>      | Yes        | Yes              |
| NM_003405    | <i>YWHAH</i>     | Yes        | Yes              |
| NM_016816    | <i>OAS1</i>      | Yes        | Yes              |
| NM_001457    | <i>FLNB</i>      | Yes        | Yes              |
| NM_003670    | <i>BHLHB2</i>    | Yes        | Yes              |
| NM_014014    | <i>ASCC3L1</i>   | Yes        | No               |
| NM_002094    | <i>GSPT1</i>     | Yes        | No               |
| NM_002080    | <i>GOT2</i>      | Yes        | Yes              |
| NM_005113    | <i>GOLGA5</i>    | Yes        | Yes              |
| NM_032547    | <i>SCOC</i>      | Yes        | Yes              |
| NM_000526    | <i>KRT14</i>     | No         | No               |
| NM_203459    | <i>CAMSAP1L</i>  | Yes        | Yes              |
| NM_030920    | <i>ANP32E</i>    | Yes        | Yes              |
| NM_015575    | <i>GIGYF2</i>    | Yes        | Yes              |
| NM_005744    | <i>ARIH1</i>     | Yes        | Yes              |
| NM_032565    | <i>EBPL</i>      | Yes        | Yes              |
| NM_177423    | <i>PPFIA1</i>    | Yes        | Yes              |
| NM_000989    | <i>RPL30</i>     | Yes        | Yes              |
| NM_014752    | <i>SPCS2</i>     | Yes        | Yes              |
| NM_201517    | <i>H2AFV</i>     | Yes        | Yes              |
| XM_031689    | —                | Yes        | Yes              |
| NM_031430    | <i>RILP</i>      | Yes        | No               |
| NM_213646    | <i>WARS</i>      | Yes        | No               |
| NM_001975    | <i>ENO2</i>      | Yes        | No               |
| NM_032940    | <i>POLR2C</i>    | Yes        | Yes              |
| NM_032366    | <i>C16orf13</i>  | Yes        | Yes              |
| NM_024881    | <i>SLC35E1</i>   | Yes        | Yes              |
| NM_005389    | <i>PCMT1</i>     | Yes        | Yes              |
| NM_020899    | <i>ZBTB4</i>     | Yes        | Yes              |
| NM_002822    | <i>TWF1</i>      | Yes        | Yes              |
| NM_016582    | <i>SLC15A3</i>   | Yes        | Yes              |
| NM_016286    | <i>DCXR</i>      | Yes        | Yes              |
| NM_001614    | <i>ACTG1</i>     | Yes        | Yes              |
| NM_001878    | <i>CRABP2</i>    | Yes        | Yes              |
| NM_144570    | <i>HN1L</i>      | Yes        | Yes              |
| NM_002272    | <i>KRT4</i>      | No         | Yes              |
| NM_001539    | <i>DNAJA1</i>    | Yes        | Yes              |
| NM_018156    | <i>VPS13D</i>    | Yes        | Yes              |
| NM_001005340 | <i>GNPMB</i>     | Yes        | Yes              |
| NM_003039    | <i>SLC2A5</i>    | Yes        | Yes              |
| NM_003467    | <i>CXCR4</i>     | Yes        | Yes              |
| NM_000661    | <i>RPL9</i>      | Yes        | Yes              |
| NM_014831    | <i>LBA1</i>      | Yes        | No               |
| NM_017830    | <i>OCIAD1</i>    | Yes        | Yes              |
| NM_007146    | <i>VEZF1</i>     | Yes        | Yes              |
| NM_016091    | <i>EIF3EIP</i>   | Yes        | Yes              |
| NM_001331    | <i>CTNND</i>     | Yes        | No               |
| NM_013230    | <i>CD24</i>      | Yes        | Yes              |
| NM_005556    | <i>KRT7</i>      | Yes        | Yes              |
| NM_002211    | <i>ITGB1</i>     | Yes        | No               |
| NM_031899    | <i>GORASP1</i>   | Yes        | Yes              |

**Table W1.** (continued)

| Sequence     | Official Symbol | CpG Island | Spotted in Array |
|--------------|-----------------|------------|------------------|
| NM_003972    | <i>BTAF1</i>    | Yes        | Yes              |
| NM_016284    | <i>CNOT1</i>    | Yes        | Yes              |
| NM_006362    | <i>NXF1</i>     | Yes        | Yes              |
| NM_006018    | <i>GPR109B</i>  | No         | Yes              |
| NM_181777    | <i>UBE2A</i>    | Yes        | Yes              |
| NM_006306    | <i>SMC1A</i>    | Yes        | Yes              |
| NM_013236    | <i>ATXN10</i>   | Yes        | Yes              |
| NM_015384    | <i>NIPBL</i>    | Yes        | Yes              |
| NM_002828    | <i>PTPN2</i>    | Yes        | No               |
| NM_018127    | <i>ELAC2</i>    | Yes        | Yes              |
| NM_002880    | <i>RAF1</i>     | Yes        | Yes              |
| NM_001008493 | <i>ENAH</i>     | Yes        | Yes              |
| NM_025137    | <i>SPG11</i>    | Yes        | Yes              |
| BC038574     | —               | Yes        | Yes              |
| NM_003376    | <i>VEGFA</i>    | Yes        | No               |
| NM_001025    | <i>RPS23</i>    | Yes        | No               |
| CV571660     | —               | Yes        | Yes              |
| CV411881     | —               | Yes        | Yes              |
| AL523333     | —               | Yes        | Yes              |
| NM_005121    | <i>MED13</i>    | Yes        | Yes              |
| NM_016072    | <i>GOLT1B</i>   | Yes        | Yes              |
| NM_004966    | <i>HNRPF</i>    | Yes        | Yes              |
| NM_015630    | <i>EPC2</i>     | Yes        | Yes              |
| NM_001002857 | <i>ANXA2</i>    | Yes        | Yes              |
| NM_016520    | <i>C9orf78</i>  | Yes        | Yes              |
| NM_006472    | <i>TXNIP</i>    | No         | Yes              |
| NM_003324    | <i>TULP3</i>    | Yes        | Yes              |
| NM_201281    | <i>MTMR2</i>    | Yes        | Yes              |
| NM_006796    | <i>AFG3L2</i>   | Yes        | Yes              |
| NM_005358    | <i>LMO7</i>     | Yes        | Yes              |
| BC027471     | —               | Yes        | Yes              |
| BM685726     | —               | Yes        | Yes              |
| NM_182926    | <i>KTN1</i>     | Yes        | Yes              |
| NM_001087    | <i>AAMP</i>     | Yes        | Yes              |
| NM_001008844 | <i>DSP</i>      | Yes        | Yes              |
| AW105461     | —               | Yes        | Yes              |

**Table W2.** Validation of Gene Expression Reactivation by qRT-PCR in 5Aza-dC–Treated HNSCC Cell Lines.

| Official Symbol | Cell Lines |            |            |            |
|-----------------|------------|------------|------------|------------|
|                 | FaDu       | UM-SCC-14A | UM-SCC-17A | UM-SCC-38A |
| <i>AAMP</i>     | 1.7        | 1.7        | ND         | ND         |
| <i>ACTG1</i>    | ND         | ND         | 0.8        | 0.6        |
| <i>AFG3L2</i>   | ND         | ND         | 1.0        | 0.5        |
| <i>ASNS</i>     | ND         | ND         | 1.1        | 0.3        |
| <i>ATP5E</i>    | 0.8        | 1.7        | 1.6        | ND         |
| <i>ATXN10</i>   | ND         | ND         | 0.9        | 0.4        |
| <i>CAPZA1</i>   | ND         | 2.5        | 1.7        | ND         |
| <i>CLDN1</i>    | 1.9        | 2.4        | ND         | ND         |
| <i>CRABP2</i>   | 4.6        | 1.9        | 1.7        | 0.4        |
| <i>DCXR</i>     | ND         | ND         | 1.3        | 1.1        |
| <i>EIF3EIP</i>  | ND         | ND         | 1.0        | 0.8        |
| <i>EPC2</i>     | 1.3        | ND         | ND         | 0.7        |
| <i>MEPCE</i>    | 0.9        | ND         | 1.5        | 1.7        |
| <i>GOT2</i>     | 0.6        | 1.1        | ND         | ND         |
| <i>HNRPF</i>    | ND         | ND         | 0.8        | 0.5        |
| <i>KTN1</i>     | ND         | ND         | 1.2        | 2.7        |
| <i>MED13</i>    | 1.3        | 1.8        | ND         | ND         |
| <i>MX1</i>      | 22.4       | 4.5        | ND         | 0.2        |
| <i>OC1AD1</i>   | 1.1        | ND         | 1.4        | 0.7        |
| <i>PCMT1</i>    | 0.9        | ND         | 1.2        | ND         |
| <i>PERP</i>     | 2.1        | 1.7        | ND         | ND         |
| <i>PLXNB1</i>   | 1.8        | ND         | ND         | 0.3        |
| <i>PSME3</i>    | ND         | ND         | 1.0        | 0.6        |
| <i>RAC1</i>     | 1.3        | ND         | 1.1        | ND         |
| <i>RAF1</i>     | ND         | ND         | 1.2        | 1.1        |
| <i>RPL30</i>    | ND         | 1.3        | 1.1        | 0.6        |
| <i>SFXN1</i>    | 0.7        | ND         | 1.3        | 0.6        |
| <i>SLC15A3</i>  | 7.3        | 2.2        | 1.0        | 3.0        |
| <i>SPG11</i>    | 1.0        | 2.0        | 1.0        | ND         |
| <i>STAG2</i>    | 1.4        | ND         | 1.9        | 1.8        |
| <i>THOC4</i>    | ND         | ND         | 0.8        | 0.8        |
| <i>TNRC15</i>   | 0.8        | ND         | ND         | 0.7        |
| <i>UQCRH</i>    | ND         | 1.6        | 1.3        | ND         |
| <i>WDR47</i>    | 1.5        | ND         | 1.6        | 0.4        |
| <i>YWHAH</i>    | ND         | ND         | 0.9        | 1.0        |

ND indicates not determined.

**Table W3.** Distribution of the HNSCC Cases According to Demographic, Lifestyle, and Clinicopathological Variables.

| Variables               | Category    | TMA, n (%) | MSP, n (%)  |
|-------------------------|-------------|------------|-------------|
| Age                     | ≤53         | 14 (19.18) | 51 (36.43)  |
|                         | >53         | 59 (80.82) | 89 (63.57)  |
| Tumor site              | Oral cavity | 23 (30.67) | 64 (45.71)  |
|                         | Larynx      | 31 (41.33) | 24 (17.14)  |
| Tumor size              | Hypopharynx | 21 (28.00) | 52 (37.14)  |
|                         | T1 + T2     | 22 (33.85) | 34 (25.37)  |
|                         | T3 + T4     | 43 (66.15) | 100 (74.63) |
| Lymph nodes             | N0          | 8 (11.43)  | 26 (19.40)  |
|                         | N+          | 62 (88.57) | 108 (80.60) |
| Grade                   | 1           | 25 (34.24) | 36 (27.48)  |
|                         | 2           | 41 (56.16) | 77 (58.78)  |
|                         | 3           | 7 (9.60)   | 18 (13.74)  |
| Vascular invasion       | No          | 57 (79.17) | 115 (86.47) |
|                         | Yes         | 15 (20.83) | 18 (13.53)  |
| Lymphatic permeation    | No          | 46 (63.89) | 87 (64.93)  |
|                         | Yes         | 26 (36.11) | 47 (35.07)  |
| Perineural infiltration | No          | 40 (55.56) | 69 (51.88)  |
|                         | Yes         | 32 (44.44) | 64 (48.12)  |

**Table W4.** Sequence and Concentration of the Primer Pairs Used in the qRT-PCR Validation of Gene Induction.

| Official Symbol | Sense   | Sequence (5' → 3')       | μM  |
|-----------------|---------|--------------------------|-----|
| <i>AAMP</i>     | Forward | CACCTTTGCATTGCACTCAG     | 0.4 |
|                 | Reverse | TATGGCCTGCACACTCAAAG     |     |
| <i>ACTG1</i>    | Forward | AGCCTTCCTTCCTGGGTATG     | 0.5 |
|                 | Reverse | TGTTGGCGTACAGGTCCTTG     |     |
| <i>AFG3L2</i>   | Forward | ACGAGGTGGCAAGAAAGATG     | 0.4 |
|                 | Reverse | ATGACTCCACCCCAGAACAG     |     |
| <i>ASNS</i>     | Forward | AAGACAGCCCCGATTTACTG     | 0.5 |
|                 | Reverse | AGAGCCTGAATGGCCTTCCTC    |     |
| <i>ATP5E</i>    | Forward | TGGCAGCAACGTAAAAATTG     | 0.4 |
|                 | Reverse | ACATGTGCCACACATCTTC      |     |
| <i>ATXN10</i>   | Forward | GCGAGTGGAAACAGGAATCTC    | 0.5 |
|                 | Reverse | AGTTCTGGGAAGCATGTCAC     |     |
| <i>CAPZA1</i>   | Forward | TCGGATGAGGAGAAGGTACG     | 0.5 |
|                 | Reverse | CCCTTCCTCAGGAGATTG       |     |
| <i>CLDN1</i>    | Forward | GGTGCAGAAGATGAGGATGG     | 0.4 |
|                 | Reverse | CATTGACTGGGTCATAGGG      |     |
| <i>CRABP2</i>   | Forward | GACCTCGTGGACCAGAGAAGCT   | 0.4 |
|                 | Reverse | CCTGGTGACACAACGTCAT      |     |
| <i>DCXR</i>     | Forward | GGCCTTTGACAGATCCTTTG     | 0.5 |
|                 | Reverse | AGCACTGGCTGGAGACATTC     |     |
| <i>EIF3EIP</i>  | Forward | ACTACCAGGCCATCAAGGTG     | 0.5 |
|                 | Reverse | GATGGCATCCTGGTAACGAC     |     |
| <i>EPC2</i>     | Forward | GCAAGGACATGCCTGATCTC     | 0.4 |
|                 | Reverse | TTGCTGTGCTGAAATTTGCTC    |     |
| <i>GOT2</i>     | Forward | AATGTTTGCCTCTGCCAATC     | 0.4 |
|                 | Reverse | CATCCGCATCTTTGCAGAC      |     |
| <i>HNRPF</i>    | Forward | GCCTGGTAGCAACAGAAACC     | 0.5 |
|                 | Reverse | CAGGTGATCTTGGGTGTGG      |     |
| <i>KTN1</i>     | Forward | GTTTCCCCAGAAACGGAGTC     | 0.5 |
|                 | Reverse | TGTGAGCTGTTGGTTTACCG     |     |
| <i>MED13</i>    | Forward | TGAAGAGCATATCACCCCTTGC   | 0.4 |
|                 | Reverse | TTGAATGCCTGTCCGTGTGAG    |     |
| <i>MEPCE</i>    | Forward | CAACCCCTGGTCGTCTGTATG    | 0.4 |
|                 | Reverse | CTGGCTTCAATTTGGATTCCG    |     |
| <i>MX1</i>      | Forward | CAATCAGCCTGCTGACATTG     | 0.4 |
|                 | Reverse | TGTCTCCTGCCTCTGGATG      |     |
| <i>OCIAD1</i>   | Forward | GAATGGGAGGGCTGATTTTC     | 0.4 |
|                 | Reverse | TGCAATCTGCCAAGACTCTC     |     |
| <i>PCMT1</i>    | Forward | CTACAGACCCTCCCACTATG     | 0.6 |
|                 | Reverse | GGAGCACTGATTGTTGCTTG     |     |
| <i>PERP</i>     | Forward | TACGAGGAGGGCTGTACAGAG    | 0.4 |
|                 | Reverse | GGCGAAGAAGGAGAGGATG      |     |
| <i>PLXNB1</i>   | Forward | TGGTTGCAAGCCATCAGAG      | 0.4 |
|                 | Reverse | CTCTTGCAAGGGGCTCTGG      |     |
| <i>PSME3</i>    | Forward | CCAAGGAACCAAGGTGTTTG     | 0.5 |
|                 | Reverse | TGGGAATCAGGAGCTGTACC     |     |
| <i>RAC1</i>     | Forward | TGCTTTTCCCTTGTGAGTCC     | 0.4 |
|                 | Reverse | ATGGGAGTGTGGGACAGTG      |     |
| <i>RAF1</i>     | Forward | GCCGAACAAGCAAAGAACAG     | 0.5 |
|                 | Reverse | AACACTGCACAGCACTCTGG     |     |
| <i>RPL30</i>    | Forward | CCTGGGGTACAAGCAGACTC     | 0.4 |
|                 | Reverse | TGATGGACACCAGTTTTAGCC    |     |
| <i>SFXN1</i>    | Forward | GCAAGTTGTCGTGTCCAGGATT   | 0.6 |
|                 | Reverse | TTCCAAAGTGTTCATAATGAATGG |     |
| <i>SLC15A3</i>  | Forward | AAGCTCGCTCTCCAAAACCTG    | 0.4 |
|                 | Reverse | GCACATTGACGGTCTCTGG      |     |
| <i>SPG11</i>    | Forward | TCTCCCAGGATAAGTCCAG      | 0.4 |
|                 | Reverse | GAGGGCTTCAGGGGAATATG     |     |
| <i>STAG2</i>    | Forward | AAACCAAAAGCAAGGCAAAAG    | 0.4 |
|                 | Reverse | GGTTTTCTCCTCCATTTCC      |     |
| <i>THOC4</i>    | Forward | CTCAGACGCCGATATTCAGG     | 0.5 |
|                 | Reverse | CTCAAAGTGCACTCTGCTG      |     |
| <i>TNRC15</i>   | Forward | CTCCAGGAGGAACCCCTTC      | 0.6 |
|                 | Reverse | TCCTCCTCCTCTGTCAATC      |     |
| <i>UQCRH</i>    | Forward | CGGAGGAGCTCTTTGACTTC     | 0.5 |
|                 | Reverse | TGCCCAGATGATGAAGACTG     |     |
| <i>WDR47</i>    | Forward | CCAGGGGTACAAAACCTCAG     | 0.4 |
|                 | Reverse | GATAGCCCTCTGTGCATCAAC    |     |
| <i>YWHAH</i>    | Forward | GCGGTGACAGACTGAATG       | 0.5 |
|                 | Reverse | TGGTTTTCTGCTCAATGCTG     |     |
